# Supplementary material for: Fabrication of Stabilized Fe–Mn Binary Oxide Nanoparticles: Effective Adsorption of 17β-Estradiol and Influencing Factors
Source: MDPI journal article supplement (doi:10.3390/ijerph15102218), 2018-10-11
Supplement: s1 [file s1]

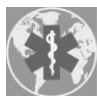

*Supplementary Material*

# Fabrication of Stabilized Fe–Mn Binary Oxide Nanoparticles: Effective Adsorption of 17 $\beta$ -Estradiol and Influencing Factors

Qimeng Ning <sup>1,2,3</sup>, Zhihong Yin <sup>1,2,\*</sup>, Yunguo Liu <sup>1,2</sup>, Xiaofei Tan <sup>1,2</sup>, Guangming Zeng <sup>1,2</sup>, Luhua Jiang <sup>1,2</sup>, Shaobo Liu <sup>4,5</sup>, Sirong Tian <sup>1,2</sup>, Ni Liu <sup>1,2</sup> and Xiaohua Wang <sup>1,2,3</sup>

<sup>1</sup> College of Environmental Science and Engineering, Hunan University, Changsha 410082, China; ningqimeng@163.com (Q.N.); hnliuyunguo@gmail.com (Y.L.); Tanxf@hnu.edu.cn (X.T.); zgming@hnu.edu.cn (G.Z.); Jiangluhua@hnu.edu.cn (L.J.); Tsirong@hnu.edu.cn (S.T.); meet\_liuni@hnu.edu.cn (N.L.); Wangxiaohua6999@126.com (X.W.)

<sup>2</sup> Key Laboratory of Environmental Biology and Pollution Control (Hunan University), Ministry of Education, Changsha 410082, China

<sup>3</sup> School of architecture and urban planning, Hunan City University, Yiyang 413000, China

<sup>4</sup> School of Architecture and Art, Central South University, Changsha 410082, China; Liushaobo23@163.com

<sup>5</sup> School of Metallurgy and Environment, Central South University, Changsha 410083, China

\* Correspondence: Yinzhong@hnu.edu.cn; Tel.: +86-731-8864-9208

## 17 $\beta$ -estradiol detection:

The E2 concentration was determined using a fluorescence quenching method via an F-4500 fluorescence spectrophotometer (Hitachi, Japan). A xenon lamp (450 W) was chosen as the excitation source, and the slits of excitation (Ex) and emission (Em) were remained at 5 nm. The fluorescence intensity of E2 was set to Ex/Em=280 nm/310 nm [1]. The calibration curve was measured by using E2 dissolved in truly dissolved solution at concentrations of 0.05–8.0 mg/L. Meanwhile, the background fluorescence intensities of 0.01 M NaCl solution were measured and subtracted under the same conditions.

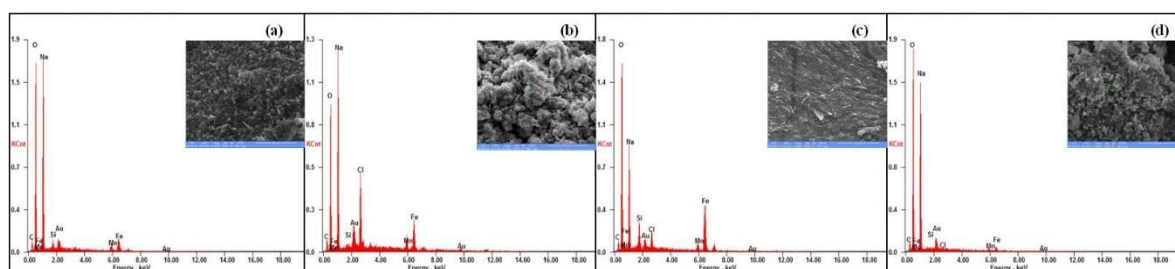

**Figure S1.** EDX spectra of (a) FMBON (b) CMC-FMBON (c) E2 adsorbed FMBON (d) E2 adsorbed CMC-FMBON.

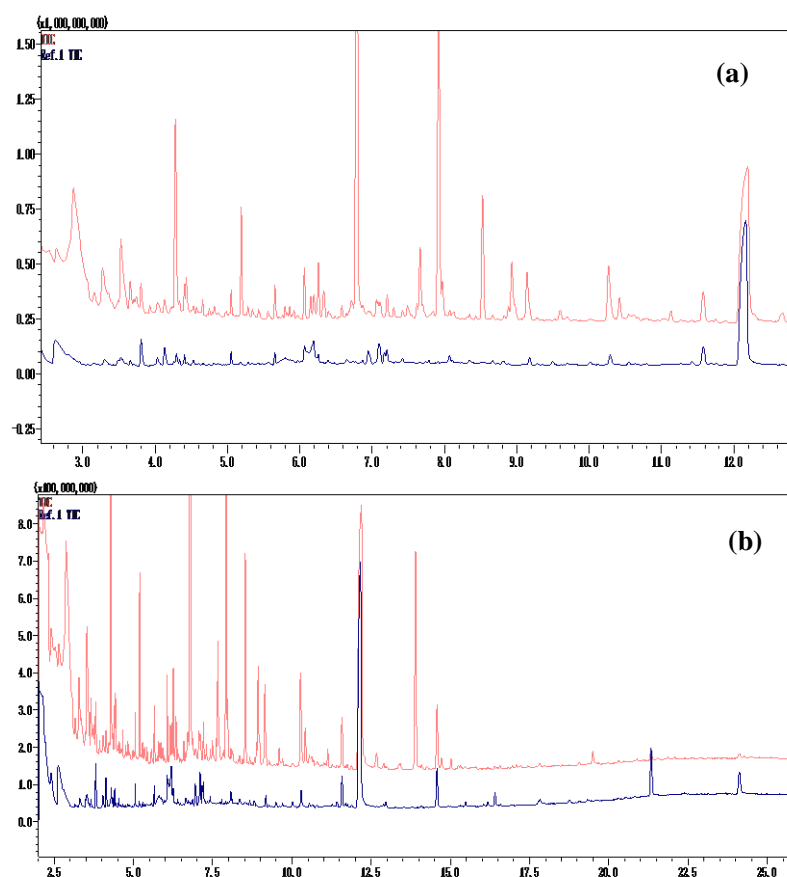

**Figure S2.** The representative chromatogram before (a) and after (b) reaction of 15 h.

[1] L.H. Jiang, Y.G. Liu, G.M. Zeng, F.Y. Xiao, X.J. Hu, X. Hu, H. Wang, T.T. Li, L. Zhou, X.F. Tan, Removal of 17 $\beta$ -estradiol by few-layered graphene oxide nanosheets from aqueous solutions: External influence and adsorption mechanism, *Chem. Eng. J.* **2016**, 284, 93–102.

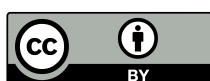

© 2018 by the authors. Submitted for possible open access publication under the terms and conditions of the Creative Commons Attribution (CC BY) license (<http://creativecommons.org/licenses/by/4.0/>).
